# Supplementary material for: Direct and Indirect Control of Mitogen-activated Protein Kinase Pathway-associated Components, BRAP/IMP E3 Ubiquitin Ligase and CRAF/RAF1 Kinase, by the Deubiquitylating Enzyme USP15
Source: PubMed Central journal article supplement — J Biol Chem. 2012 Oct 26;287(51):43007–18. doi: 10.1074/jbc.M112.386938 (PMC3522295; doi:10.1074/jbc.m112.386938), 2012-10-26
Supplement: supp_M112.386938_jbc.M112.386938-1.pdf [file supp_M112.386938_jbc.M112.386938-1.pdf]

| Bait GeneID | Bait Gene Name | Prey Gene Name | Prey GeneID | HIS3       | ADE2 | lacZ |
|-------------|----------------|----------------|-------------|------------|------|------|
| 7347        | UCHL3          | LONRF1         | 91694       | ++         |      |      |
| 7347        | UCHL3          | TRIM27         | 5987        | +          |      |      |
| 51377       | UCHL5          | TRIM27         | 5987        | +          |      |      |
| 51377       | UCHL5          | RBCK1          | 10616       | ++         | ++   |      |
| 51377       | UCHL5          | TRIM46         | 80128       | +          |      |      |
| 9099        | USP2           | BRCA1          | 672         | ++         |      | +++  |
| 9099        | USP2           | MNAT1          | 4331        | ++         | ++   |      |
| 9099        | USP2           | TRIM21         | 6737        | +          | +    |      |
| 9099        | USP2           | TRAP           | 10293       | +          | +    |      |
| 9099        | USP2           | RBCK1          | 10616       | ++         | ++   |      |
| 9099        | USP2           | UBOX5          | 22888       | ++         | ++   |      |
| 9099        | USP2           | TRIM35         | 23087       | ++         | ++   |      |
| 9099        | USP2           | TRIM27         | 5987        | +          | ++   |      |
| 9099        | USP2           | TRIM34         | 53840       | ++         | ++   | +++  |
| 9099        | USP2           | RNF125         | 54941       | ++         | ++   | +++  |
| 9099        | USP2           | RNF126         | 55658       | ++         | ++   | +++  |
| 9099        | USP2           | TRIM39         | 56658       | ++         |      |      |
| 9099        | USP2           | TRIM46         | 80128       | ++         | ++   | +++  |
| 9099        | USP2           | TRIM8          | 81603       | ++         | ++   | +++  |
| 9099        | USP2           | PCGF6          | 84108       | +++        | +++  | +++  |
| 9099        | USP2           | TRIM5          | 85363       | ++         |      |      |
| 9099        | USP2           | LRSAM1         | 90678       | ++         | ++   |      |
| 9099        | USP2           | LONRF1         | 91694       | ++         | ++   |      |
| 9099        | USP2           | TRIM9          | 114088      | ++         |      |      |
| 9099        | USP2           | RNF166         | 115992      | +          | +    |      |
| 9099        | USP2           | DTX3           | 196403      | ++         | ++   |      |
| 9099        | USP2           | LNK2           | 222484      | +          | +    |      |
| 9099        | USP2           | RNF144B        | 255488      | +++        | +++  | +++  |
| 9099        | USP2           | TRIM74         | 378108      | ++         | ++   | +++  |
| 9099        | USP2           | TRIM23         | 373         | +          | ++   |      |
| 9099        | USP2           | CBLC           | 23624       | ++         | ++   |      |
| 7375        | USP4           | TRIM21         | 6737        | ++         |      |      |
| <b>7375</b> | <b>USP4</b>    | <b>BRAP</b>    | <b>8315</b> | <b>++</b>  |      |      |
| 8078        | USP5           | TRIM26         | 7726        | ++         |      |      |
| 8078        | USP5           | TRIM39         | 56658       | ++         |      |      |
| 8078        | USP5           | TRIM5          | 85363       | ++         |      |      |
| 7874        | USP7           | TRIM27         | 5987        | +++        | +++  |      |
| 7874        | USP7           | RBCK1          | 10616       | +++        | +++  |      |
| 7874        | USP7           | TRIM31         | 11074       | ++         |      |      |
| 7874        | USP7           | MARCH7         | 64844       | +++        | ++   |      |
| 7874        | USP7           | TRIM8          | 81603       | +++        | +++  | +++  |
| 7874        | USP7           | UHRF2          | 115426      | ++         |      |      |
| 8237        | USP11          | TRAF6          | 7189        | +          |      |      |
| 8237        | USP11          | PHF7           | 51533       | ++         | ++   |      |
| 8237        | USP11          | TRIM46         | 80128       | +++        | ++   |      |
| 8237        | USP11          | DTX3           | 196403      | ++         | ++   |      |
| 9958        | USP15          | TRIM21         | 6737        | ++         | ++   |      |
| <b>9958</b> | <b>USP15</b>   | <b>BRAP</b>    | <b>8315</b> | <b>+++</b> |      |      |
| 9958        | USP15          | RBCK1          | 10616       | +          | +    |      |
| 9958        | USP15          | TRIM17         | 51127       | +          |      |      |
| 9958        | USP15          | PHF7           | 51533       | ++         | ++   |      |
| 9958        | USP15          | RNF126         | 55658       | +          | ++   |      |
| 9958        | USP15          | TRIM46         | 80128       | ++         | ++   |      |
| 9958        | USP15          | TRIM5          | 85363       | ++         |      |      |
| 9958        | USP15          | RNF144B        | 255488      | ++         | ++   |      |

|        |         |         |        |     |     |     |
|--------|---------|---------|--------|-----|-----|-----|
| 9958   | USP15   | TRIM74  | 378108 | +   | ++  |     |
| 27005  | USP21   | CBLC    | 23624  | ++  | +   |     |
| 27005  | USP21   | CCBL    | 867    | ++  |     |     |
| 27005  | USP21   | TRIM23  | 373    | +   | +   |     |
| 27005  | USP21   | RNF144A | 9781   | ++  |     |     |
| 27005  | USP21   | LRSAM1  | 90678  | +   |     |     |
| 27005  | USP21   | RBCK1   | 10616  | +   | ++  |     |
| 27005  | USP21   | TRIM8   | 81603  | ++  | ++  |     |
| 27005  | USP21   | PCGF6   | 84108  | +++ | +++ |     |
| 27005  | USP21   | TRIM5   | 85363  | ++  |     |     |
| 27005  | USP21   | RNF185  | 91445  | ++  |     |     |
| 27005  | USP21   | TRIM9   | 114088 | ++  |     |     |
| 27005  | USP21   | DTX3    | 196403 | ++  |     |     |
| 27005  | USP21   | RNF144B | 255488 | +++ | +++ |     |
| 84669  | USP32   | RBCK1   | 10616  | ++  | ++  |     |
| 84669  | USP32   | TRIM46  | 80128  | ++  | ++  |     |
| 84669  | USP32   | RNF144B | 255488 | ++  | ++  |     |
| 84669  | USP32   | TRIM74  | 378108 | ++  | ++  |     |
| 57602  | USP36   | TRIM26  | 7726   | ++  |     |     |
| 10713  | USP39   | TRAF6   | 7189   | +   |     |     |
| 10713  | USP39   | TRIM25  | 7706   | +   |     |     |
| 10713  | USP39   | TRIM26  | 7726   | +   |     |     |
| 10713  | USP39   | TRIM39  | 56658  | +   |     |     |
| 10713  | USP39   | TRIM8   | 81603  | ++  |     |     |
| 10713  | USP39   | TRIM5   | 85363  | +   |     |     |
| 25862  | USP49   | TRIM35  | 23087  | ++  |     |     |
| 25862  | USP49   | RBCK1   | 10616  | +   | +++ |     |
| 9924   | PAN2    | RBCK1   | 10616  | +   | ++  |     |
| 9924   | PAN2    | TRIM35  | 23087  | ++  | ++  |     |
| 9924   | PAN2    | RNF144B | 255488 | +   | ++  |     |
| 55611  | OTUB1   | RNF126  | 55658  | +   | ++  |     |
| 78990  | OTUB2   | TRIM27  | 5987   | +   |     |     |
| 78990  | OTUB2   | TRAF6   | 7189   | ++  |     |     |
| 78990  | OTUB2   | TRIM25  | 7706   | ++  |     |     |
| 78990  | OTUB2   | TRIM26  | 7726   | ++  |     |     |
| 78990  | OTUB2   | RBCK1   | 10616  | +   |     |     |
| 78990  | OTUB2   | TRIM2   | 23321  | +   |     |     |
| 78990  | OTUB2   | RNF126  | 55658  | +   |     |     |
| 78990  | OTUB2   | TRIM39  | 56658  | ++  |     |     |
| 78990  | OTUB2   | TRIM8   | 81603  | +++ | +   |     |
| 78990  | OTUB2   | TRIM5   | 85363  | +++ |     |     |
| 139562 | OTUD6A  | RNF2    | 6045   | ++  | ++  |     |
| 139562 | OTUD6A  | RBCK1   | 10616  | +   | +   |     |
| 139562 | OTUD6A  | CBLC    | 23624  | ++  |     |     |
| 139562 | OTUD6A  | TRIM39  | 56658  | ++  | ++  | +++ |
| 139562 | OTUD6A  | TRIM46  | 80128  | ++  | ++  | +++ |
| 139562 | OTUD6A  | TRIM5   | 85363  | ++  |     |     |
| 7128   | TNFAIP3 | TRIM23  | 373    | ++  | ++  |     |
| 7128   | TNFAIP3 | RNF5    | 6048   | ++  |     |     |
| 7128   | TNFAIP3 | TRAF6   | 7189   | ++  |     | +++ |
| 7128   | TNFAIP3 | TRIM25  | 7706   | +   |     |     |
| 7128   | TNFAIP3 | TRIM26  | 7726   | +   |     |     |
| 7128   | TNFAIP3 | RNF144A | 9781   | ++  | ++  |     |
| 7128   | TNFAIP3 | RBCK1   | 10616  | ++  | ++  |     |
| 7128   | TNFAIP3 | RNF126  | 55658  | ++  |     |     |
| 7128   | TNFAIP3 | TRIM39  | 56658  | +   |     |     |
| 7128   | TNFAIP3 | TRIM8   | 81603  | +++ | +++ |     |
| 7128   | TNFAIP3 | TRIM5   | 85363  | +++ | +   |     |

|       |          |         |        |     |     |     |
|-------|----------|---------|--------|-----|-----|-----|
| 7128  | TNFAIP3  | RNF185  | 91445  | ++  |     |     |
| 80124 | VCPIP1   | TRAF6   | 7189   | ++  |     | +++ |
| 80124 | VCPIP1   | TRIM46  | 80128  | ++  | ++  | ++  |
| 80124 | VCPIP1   | DTX3    | 196403 | ++  |     |     |
| 55432 | YOD1     | RNF5    | 6048   | +   |     |     |
| 55432 | YOD1     | TRAF6   | 7189   | ++  |     | +++ |
| 55432 | YOD1     | TRIM25  | 7706   | ++  |     | +++ |
| 55432 | YOD1     | TRIM26  | 7726   | ++  |     |     |
| 55432 | YOD1     | TRIM39  | 56658  | ++  |     | +++ |
| 55432 | YOD1     | TRIM8   | 81603  | +++ | +++ | +++ |
| 55432 | YOD1     | TRIM5   | 85363  | +++ |     |     |
| 55432 | YOD1     | DTX3    | 196403 | ++  |     |     |
| 5713  | PSMD7    | TRIM34  | 53840  | +++ | +++ |     |
| 5713  | PSMD7    | RNF32   | 140545 | ++  |     |     |
| 57559 | STAMBPL1 | TRAF6   | 7189   | ++  |     | +++ |
| 57559 | STAMBPL1 | TRAIIP  | 10293  | ++  |     |     |
| 57559 | STAMBPL1 | RBCK1   | 10616  | ++  | ++  |     |
| 57559 | STAMBPL1 | UBOX5   | 22888  | ++  |     |     |
| 57559 | STAMBPL1 | TRIM35  | 23087  | ++  |     |     |
| 57559 | STAMBPL1 | MKRN1   | 23608  | ++  |     |     |
| 57559 | STAMBPL1 | ANAPC11 | 51529  | +   |     |     |
| 57559 | STAMBPL1 | TRIM39  | 56658  | ++  |     |     |
| 57559 | STAMBPL1 | TRIM46  | 80128  | ++  |     |     |
| 57559 | STAMBPL1 | TRIM74  | 378108 | ++  |     |     |
| 79184 | BRCC3    | TRAF6   | 7189   | ++  |     | +++ |
| 79184 | BRCC3    | RBCK1   | 10616  | ++  | ++  |     |
| 79184 | BRCC3    | TRIM35  | 23087  | ++  | ++  |     |
| 79184 | BRCC3    | MKRN1   | 23608  | ++  | ++  |     |
| 79184 | BRCC3    | RNF126  | 55658  | ++  | ++  | +++ |
| 79184 | BRCC3    | TRIM46  | 80128  | ++  | ++  |     |
| 79184 | BRCC3    | RNF144B | 255488 | +++ | +++ |     |
| 79184 | BRCC3    | TRIM74  | 378108 | +   | ++  |     |
| 10980 | COPS6    | MNAT1   | 4331   | +   | +   |     |
| 10980 | COPS6    | RBCK1   | 10616  | ++  | ++  |     |
| 10980 | COPS6    | TRIM31  | 11074  | +   | ++  |     |
| 10980 | COPS6    | TRIM35  | 23087  | +   | ++  |     |
| 10980 | COPS6    | TRIM34  | 53840  | ++  | ++  |     |
| 10980 | COPS6    | RNF126  | 55658  | ++  | ++  |     |
| 10980 | COPS6    | TRIM46  | 80128  | ++  | ++  | +++ |
| 10980 | COPS6    | RNF144B | 255488 | ++  | ++  |     |
| 10980 | COPS6    | TRIM74  | 378108 | ++  | ++  |     |
| 8667  | EIF3H    | TRIM46  | 80128  | ++  | ++  |     |
| 8665  | EIF3F    | RBCK1   | 10616  | +++ | +++ | +++ |
| 8665  | EIF3F    | RNF126  | 55658  | ++  | ++  |     |
| 8665  | EIF3F    | TRIM46  | 80128  | ++  |     | +++ |
| 8665  | EIF3F    | RNF144B | 255488 | +++ | +++ | +++ |
| 92552 | ATXN3L   | TRAF6   | 7189   | +   |     |     |
| 92552 | ATXN3L   | BFAR    | 51283  | ++  |     |     |
| 92552 | ATXN3L   | RFWD3   | 55159  | ++  |     |     |
| 92552 | ATXN3L   | TRIM36  | 55521  | +   |     |     |

**Supplementary Table 1: DUB-RING E3 ligase interaction summary.** Bait DUB and prey RING E3 ligase GenelDs and Gene Symbols are indicated. Interactions were scored as weak (+), medium strength (++), or strong (+++). These descriptive words refer to the level of reporter activation, assessed by the level of yeast colony growth. The three reporters used are indicated (*HIS3*, *ADE2*, and *lacZ*).
